# Supplementary material
Source: PubMed Central journal article supplement (PMC4208472)

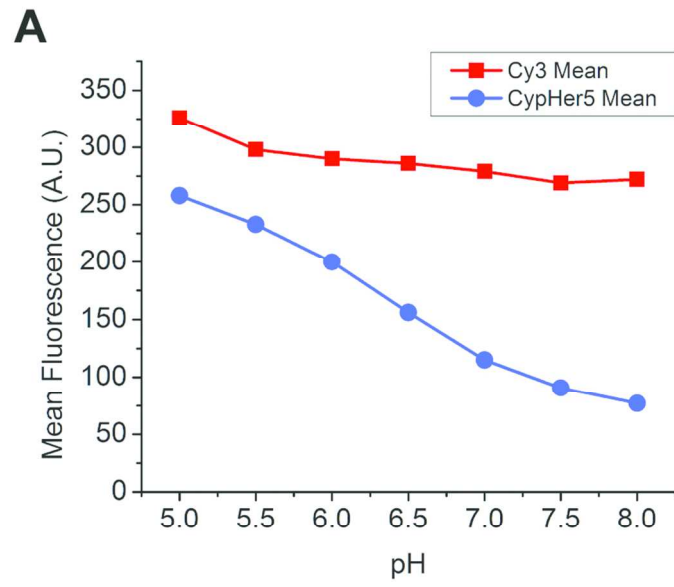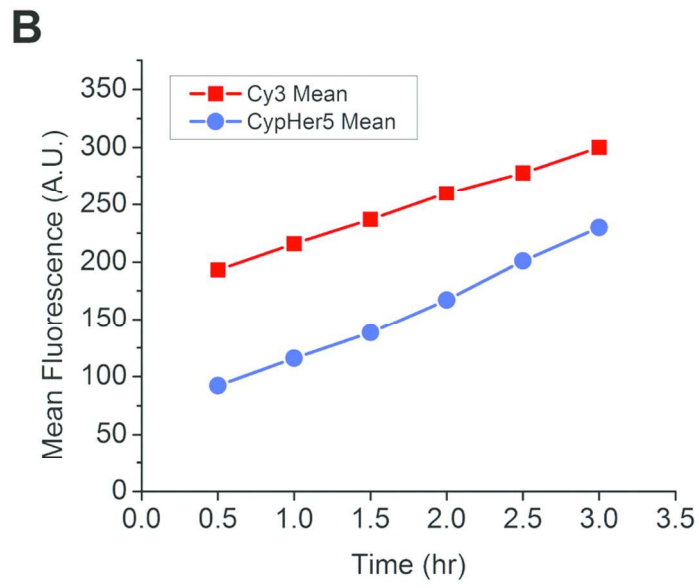

80x129mm (300 x 300 DPI)

Supplement: NIHMS544202-supplement-3_si_002.pdf [file NIHMS544202-supplement-3_si_002.pdf]
